# Supplementary material
Source: publisher figshare collection journal article supplement (https://frontiersin.figshare.com/ndownloader/files/27243743)
Supplement: Supplementary file 1 [file 27243743]

Supplementary Material

# Supplementary Figures


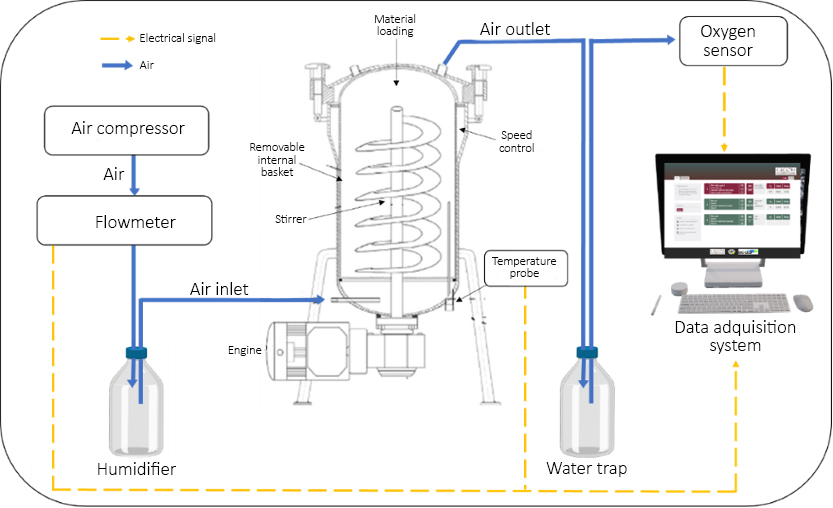


**Supplementary Figure 11.** Scheme for the R22 fermentation system.


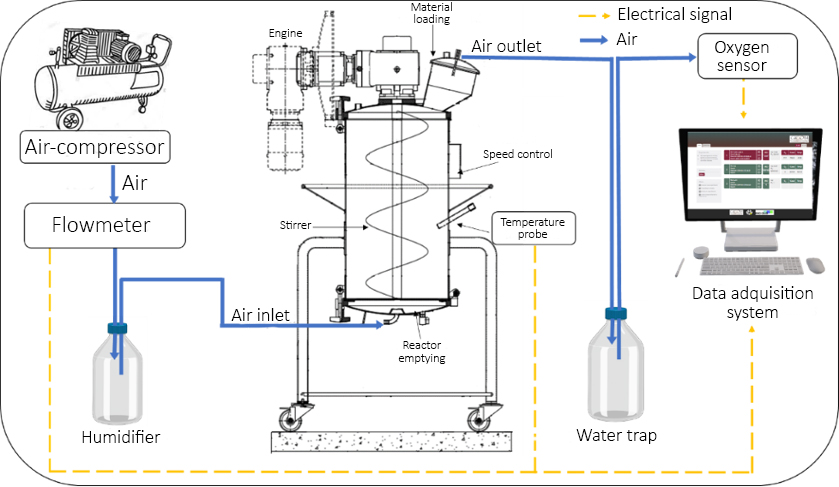


**Supplementary Figure 12.** Scheme for the R100 fermentation system.


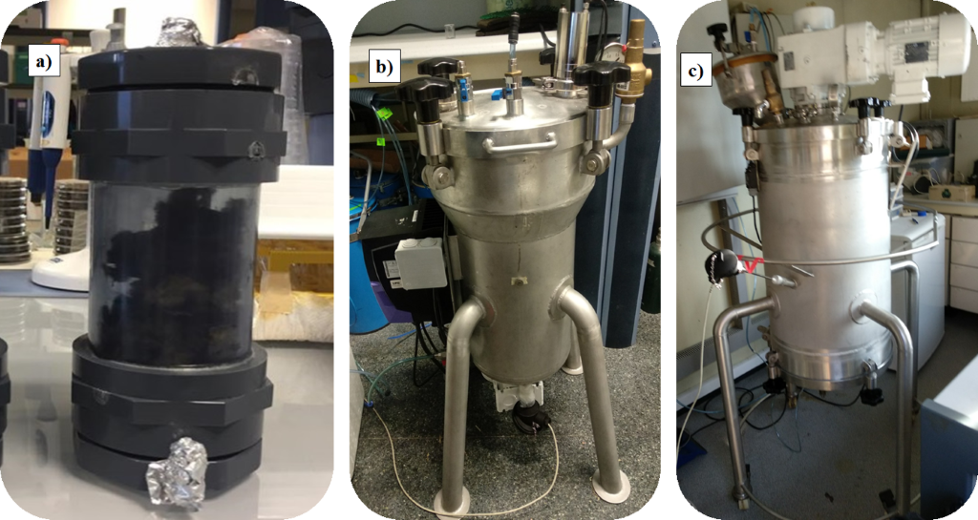


**Supplementary Figure 13.** Images of the three bioreactors compared in this study: a) lab scale 0.5L; b) R22 and c) R100.
